# Supplementary material
Source: PubMed Central journal article supplement (PMC6128760)
Supplement: NIHMS1501282-supplement-7.pdf [file NIHMS1501282-supplement-7.pdf]

**Table S2. List of sequences of constructs.**

| NAME                        | SEQUENCE                                                                                                  |
|-----------------------------|-----------------------------------------------------------------------------------------------------------|
| <b>GFP fusion protein</b>   |                                                                                                           |
| GFP-L2-CPP                  | ...EFVTAAGITLGMDELYK GIGSGSNGSSGS SPQYTIADAGDFYLHPSYYML<br>RKRRKR                                         |
| GFP-L2-6A                   | ...EFVTAAGITLGMDELYK GIGSGSNGSSGS SPQYTIADAGDFYLHPSYYML<br>AAAAAA                                         |
| GFP-L2-3R                   | ...EFVTAAGITLGMDELYK GIGSGSNGSSGS SPQYTIADAGDFYLHPSYYML<br>RRR                                            |
| <b>CD8 fusion protein</b>   |                                                                                                           |
| GFP11-CD8-CIMPR             | MALPVTALLLPLALLLHAARP(RDHMLHEYVNAAGITGGSGG) <sub>6</sub><br>RDHMLHEYVNAAGITGGKSQFRV....                   |
| CD8-CIMPR-GFP11             | ...DDSEDELLHVGSSGSS(RDHMLHEYVNAAGITGGSGG) <sub>6</sub><br>RDHMLHEYVNAAGITGGK                              |
| <b>GFP11 fusion protein</b> |                                                                                                           |
| GFP11-16L2-16CPP            | ...(RDHMLHEYVNAAGITGGSGG) <sub>6</sub> RDHMLHEYVNAAGITGGKFGIGSGS<br>NGSSGS SPQYTIADAGDFYLHPSYYMLRKRRKR    |
| GFP11-16L2-TatCPP           | ...(RDHMLHEYVNAAGITGGSGG) <sub>6</sub> RDHMLHEYVNAAGITGGKFGIGSGS<br>NGSSGS SPQYTIADAGDFYLHPSYYMLRRQRKKRRR |
| GFP11-16L2-6A               | ...(RDHMLHEYVNAAGITGGSGG) <sub>6</sub> RDHMLHEYVNAAGITGGKFGIGSGS<br>NGSSGS SPQYTIADAGDFYLHPSYYMLAAAAAA    |
| GFP11-16L2-3R               | ...(RDHMLHEYVNAAGITGGSGG) <sub>6</sub> RDHMLHEYVNAAGITGGKFGIGSGS<br>NGSSGS SPQYTIADAGDFYLHPSYYMLRRR       |
| GFP11-16L2-5CPP             | ...(RDHMLHEYVNAAGITGGSGG) <sub>6</sub> RDHMLHEYVNAAGITGGKFGIGSGS<br>NGSSGS SPQYTIADAGDFYLHPSYYMLRRKRKRK   |
| GFP11-16L2-18CPP            | ...(RDHMLHEYVNAAGITGGSGG) <sub>6</sub> RDHMLHEYVNAAGITGGKFGIGSGS<br>NGSSGS SPQYTIADAGDFYLHPSYYMLKKRKR     |
| GFP11-16L2-31CPP            | ...(RDHMLHEYVNAAGITGGSGG) <sub>6</sub> RDHMLHEYVNAAGITGGKFGIGSGS<br>NGSSGS SPQYTIADAGDFYLHPSYYMLKRRRKR    |
| <b>GFP11-tagged PsV</b>     |                                                                                                           |
| HPV16-GFP11-CPP             | ...FYLHPSYYML(RDHMLHEYVNAAGITGGSGG) <sub>6</sub> RDHMLHEYVNAAGIT<br>GGKFRKRRKRLPYFFSDVSLAA                |
| HPV16-CPP-GFP11             | ...YYMLRKRKRKRLPYFFSDVSLAADASGSSGSS(RDHMLHEYVNAAGIT<br>GGSGG) <sub>6</sub> RDHMLHEYVNAAGITGGKFPRL         |
| HPV16-GFP11-3R              | ...FYLHPSYYML(RDHMLHEYVNAAGITGGSGG) <sub>6</sub> RDHMLHEYVNAAGIT<br>GGKFRRLPYFFSDVSLAA                    |
| HPV16-3R-GFP11              | ...YYMLRRRLPYFFSDVSLAADASGSSGSS(RDHMLHEYVNAAGIT<br>GGSGG) <sub>6</sub> RDHMLHEYVNAAGITGGKFPRL             |
| HPV5-CPP-GFP11              | .....FYLHPSLRRRKRKRKYL DASGSSGSS(RDHMLHEYVNAAGIT<br>GGSGG) <sub>6</sub> RDHMLHEYVNAAGITGGKFPRL            |
