# Supplementary material
Source: PubMed Central journal article supplement (PMC6128760)

**A**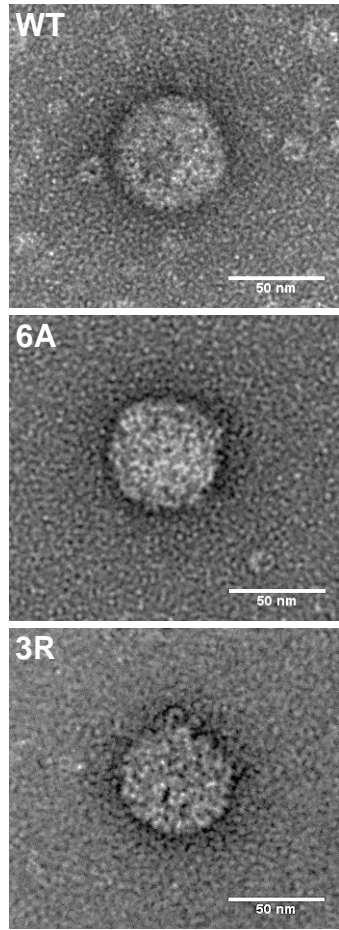**B**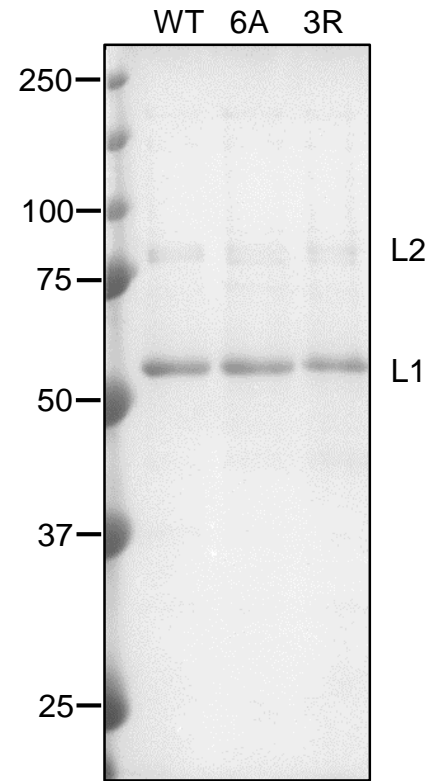**C**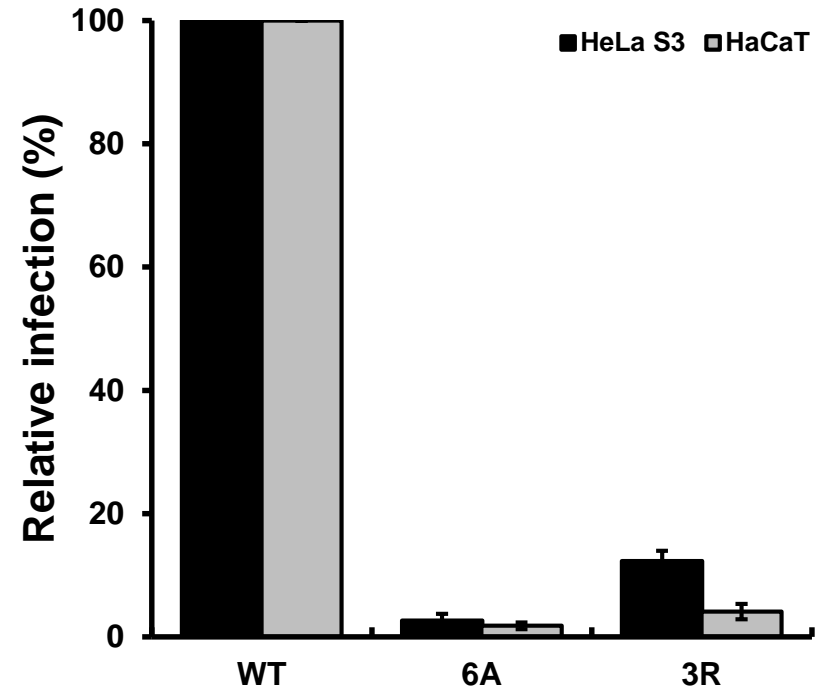

Supplement: NIHMS1501282-supplement-1.pdf [file NIHMS1501282-supplement-1.pdf]

A

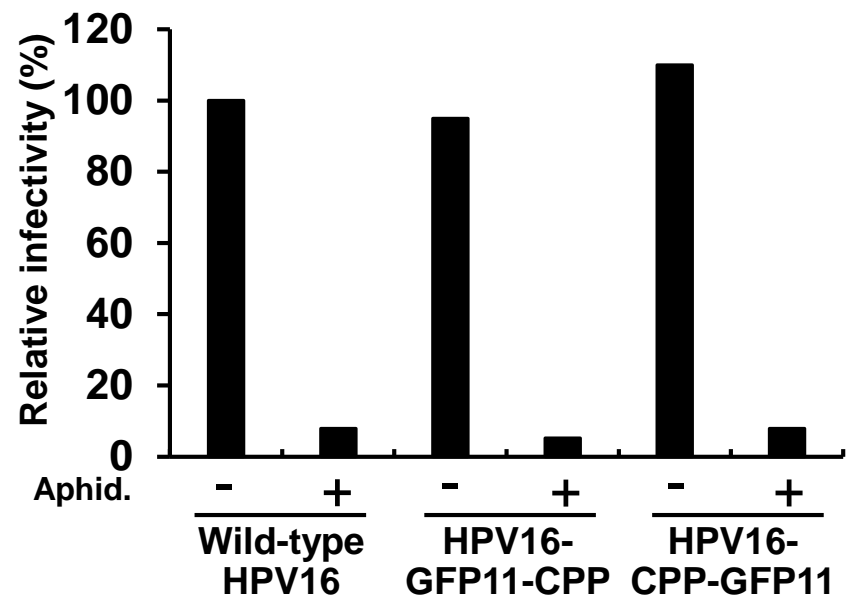

B

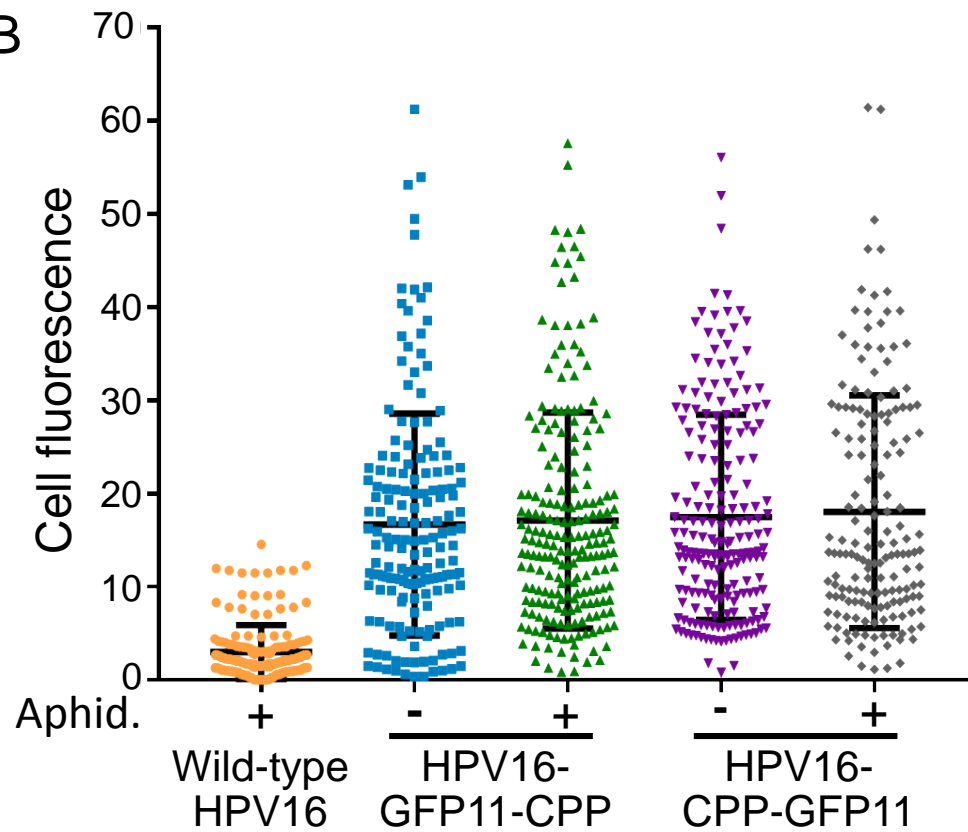

Supplement: NIHMS1501282-supplement-5.pdf [file NIHMS1501282-supplement-5.pdf]
